# Supplementary material for: PD-L1 produced by HaCaT cells under polyinosinic-polycytidylic acid stimulation inhibits melanin production by B16F10 cells
Source: PubMed Central journal article supplement (PMC7241723; doi:10.1371/journal.pone.0233448), 2020-05-21
Supplement: pone.0233448.s001.pdf [file pone.0233448.s001.pdf]

Anti-PD-L1 blot

1 2 3 4 5 6 7 8 9 10

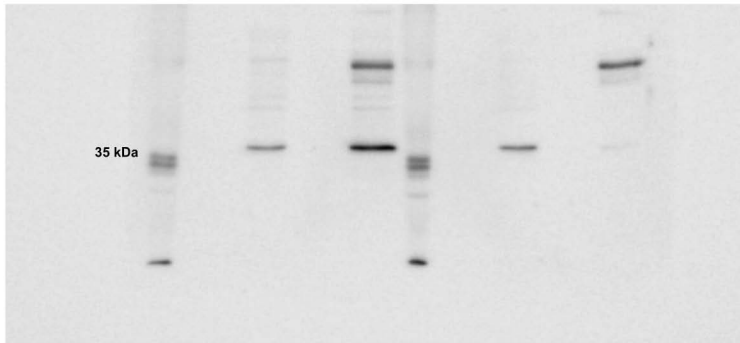

- 1 Marker
- 2 HaCaT - media change
- 3 HaCaT - Poly(I:C) Tx, media change
- 4 HaCaT
- 5 HaCaT - Poly(I:C) Tx

- 6 Marker
- 7 B16F10 - media change
- 8 B16F10 - Poly(I:C) Tx, media change
- 9 B16F10
- 10 B16F10 - Poly(I:C) Tx

Anti- $\beta$ -actin blot

1 2 3 4 5

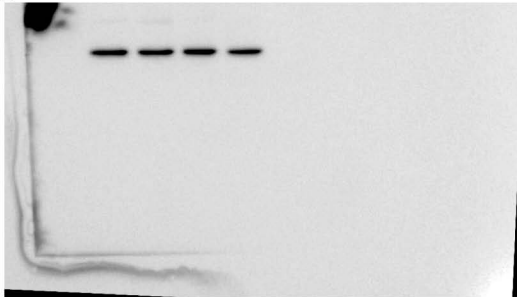

- |   |                       |
|---|-----------------------|
| 1 | Marker                |
| 2 | B16F10                |
| 3 | B16F10 - Poly(I:C) Tx |
| 4 | HaCaT                 |
| 5 | HaCaT - Poly(I:C) Tx  |
